# Supplementary material for: Decarbonization potential of on-road fuels and powertrains in the European Union and the United States: a well-to-wheels assessment
Source: Royal Society of Chemistry journal article supplement (doi:10.1039/d2se00411a), 2022-01-01
Supplement: d2se00411a1.pdf [file d2se00411a1.pdf]

ARTICLE

Supplementary Information for Decarbonization Potentials of On-Road Fuels and Powertrains in the European Union and the United States: A Well-to-Wheels Assessment

Hao Cai,<sup>a\*</sup> Matteo Prussi,<sup>b,e\*</sup> Longwen Ou,<sup>a</sup> Michael Wang,<sup>a</sup> Marta Yugo,<sup>c</sup> Laura.Lonza,<sup>d</sup> Nicolae Scarlat<sup>b</sup>

1. Key GREET and JEC parametric assumptions for calculating WTW GHG emissions of the examined vehicle/fuel systems

1.1 Petroleum gasoline and diesel production pathways

**1.1.1 Upstream emissions (crude oil).** U.S. refineries process conventional crude oil and Canadian oil sands. During crude oil recovery, the vented CH<sub>4</sub> and CO<sub>2</sub> emissions from associated gas flaring and venting contribute significantly to greenhouse gas (GHG) emissions. Canadian oil sands accounted for about 8.1% of the total crude inputs to U.S. refineries in 2015.<sup>1</sup> The recovery of crude from Canadian oil sands is more energy-intensive and GHG-emission-intensive than the recovery of conventional crude. Canadian oil sands are produced from surface mining or *in situ* production. Most of the surface-mined bitumen is upgraded to synthetic crude oil (SCO), but only a small share of the *in situ* produced bitumen is upgraded to SCO. The majority of *in situ* bitumen is diluted with natural gas (NG) condensate to form diluted bitumen (dilbit). Table S1 lists the key assumptions employed in assessing recovery of conventional crude and oil sands in GREET. Since upgrading bitumen to SCO requires a significant amount of hydrogen, the hydrogen consumption per unit of processed bitumen from surface mining is higher than that from the *in situ*-situ production, as shown in Table S1.

In Europe, the upstream contribution to the WTW carbon intensity of conventional (fossil-based) gasoline or diesel could vary from 5% to 10%. The difficulty of estimating numbers related to upstream emissions is high due to three major issues:

- Variety in the of crude oil slate per refinery (potentially based on a trading scheme including permanent contracts as well as on-the-spot operations, depending on the specific refinery).
- Production conditions for conventional crude oil that vary considerably between producing regions, fields and even between individual wells. It is only deemed meaningful to give typical or average energy consumption and GHG

emission figures for the wide range of crudes relevant to Europe, hence the wide variability range indicated.

**Table S1.** Key assumptions for conventional crude recovery and Canadian oil sands recovery/upgrading<sup>1,2</sup>

| Parameter                                                                    | Conventional Crude                | Canadian Oil Sands — Surface Mining | Canadian Oil Sands — <i>In-Situ</i> Production |
|------------------------------------------------------------------------------|-----------------------------------|-------------------------------------|------------------------------------------------|
| Recovery efficiency: percent                                                 | 98.0<br>[97.4; 98.5] <sup>a</sup> | 92.6 <sup>b</sup><br>[90.6; 94.5]   | 83.1<br>[81.6; 84.7] <sup>b</sup>              |
| Vented CH <sub>4</sub> emissions: g CO <sub>2</sub> e/MJ of crude            | 2.3 <sup>c</sup>                  | 3.2 <sup>c</sup>                    | 0                                              |
| CO <sub>2</sub> from associated gas flaring: g CO <sub>2</sub> e/MJ of crude | 1.0 <sup>e</sup>                  | 0                                   | 0                                              |
| Hydrogen use for upgrade: J H <sub>2</sub> /MJ of SCO or dilbit              |                                   | 50,783                              | 42,973                                         |

<sup>a</sup> The values in the square brackets indicate the P10 and P90 of the parameters.

<sup>b</sup> Including upgrading to SCO

<sup>c</sup> CH<sub>4</sub> emissions from vented associated gas and crude processing

<sup>d</sup> CH<sub>4</sub> emissions from tailings ponds

<sup>e</sup> CO<sub>2</sub> emissions from associated gas flaring and venting

- Data availability at the oil field. The lack of reliable public information per individual oil field is significant, and assuming one single number representative of a specific country has the risk of being misleading, since the efficiency of the operations and the behavior of the oil field could significantly impact the CO<sub>2</sub> intensity of the crude oil extraction and production processes.

Because of these factors, *JEC v5*<sup>3-15</sup> uses average numbers for the crude oils processed in Europe, based on a detailed study conducted by the International Council on Clean Transportation (ICCT) with Stanford University, Energy Redefined, and Defense Terre.<sup>16</sup> The aim of that European Commission-led project was to estimate the upstream emissions of fossil fuel feedstocks for transport fuels, and the final paper presents the results of several studies on the EU crude oil market, a model for lifecycle analysis of crude oil extraction (the Oil Production Greenhouse gas Emissions Estimator [OPGEE] model), and an estimate of the

<sup>a</sup> Systems Assessment Center, Energy Systems Division, Argonne National Laboratory, Lemont, Illinois, USA.

<sup>b</sup> The Joint Research Centre (JRC), European Commission, Ispra, Italy.

<sup>c</sup> CONCAWE, Bruxelles, Belgium.

<sup>d</sup> Directorate General Climate Action (DG-CLIMA), European Commission, Bruxelles, Belgium

<sup>e</sup> Polytechnic University of Turin, Turin, Italy.

\*Corresponding authors: Hao Cai, [hcai@anl.gov](mailto:hcai@anl.gov); Matteo Prussi, [matteo.prussi@epolito.it](mailto:matteo.prussi@epolito.it), Nicolae Scarlat [nicolae.scarlat@ec.europa.eu](mailto:nicolae.scarlat@ec.europa.eu)

carbon intensity of oil supplied to the European Union in 2010 (latest consistent data set available).

In order to determine the average energy/CO<sub>2</sub>e intensity value of crude oils used in Europe, the list of crudes consumed in Europe published by DG Energy in 2010<sup>16</sup> is used as the starting point. Based on location and information from the American Petroleum Institute (API) and the Crude Information Management System (CIMS) database, every crude stream is allocated to the oilfield from which it would most likely come (with important caveats around this assumption, as it is not possible to directly determine from the DG Energy data exactly which fields have supplied Europe). Then the average carbon intensity of the EU baseline is calculated from the field-specific carbon intensities using the OPGEE tool:

- Each oilfield in the baseline is associated with a particular crude from the DG Energy reporting.
- Having assigned CIs to each individual crude, these are used to estimate the average carbon intensity of crude supplied to Europe in 2010 overall. This is done by taking the average CI across all DG Energy identified crudes (calculated by OPGEE based on key parameters of every single oilfield, assuming default values when unknown) weighted by their contribution to the EU crude slate.

Despite the limitations of the available data and the OPGEE model as stated in [ICCT 2014], which most likely overestimates the energy consumption associated with the EU average crude slate, the JEC decided to use the results of the ICCT study in *JEC v5* as the best available estimate. Therefore, the updated oil upstream value (without including the oil transport stage) is 9.0 g CO<sub>2</sub>e/MJ crude (0.0244 g CO<sub>2</sub>eq/MJ crude as CH<sub>4</sub> emissions). This value is used in all related pathways of the present *JEC v5* study as the carbon intensity for the oil production stage. It is also aligned to what an EU Commission's Directorate-General for Climate Action (DG CLIMA)-led consortium presented as inputs for their *study on actual GHG emissions for diesel, gasoline, kerosene and natural gas*. In addition, the energy used to transport crude oil to crude oil refineries in Europe is indicated with about 0.008 MJ per MJ of transported crude oil, corresponding to about 0.7 g CO<sub>2</sub>eq/MJ. [Exergia et al. 2015]

**1.1.2 Refining emissions.** In GREET, the average petroleum refining efficiencies for gasoline and diesel production were estimated at 89.2% as a function of crude oil quality and the refinery configuration.<sup>17</sup> In *JEC v5*, the diesel and gasoline carbon intensity values are derived from the Concawe linear programming model representing the behavior of the European refining system (as described in the main paper).

| Table S2. Key assumptions of petroleum gasoline pathways in GREET and JEC analyses.           |                                |         |
|-----------------------------------------------------------------------------------------------|--------------------------------|---------|
| Assumption                                                                                    | GREET                          | JEC v5  |
| Crude recovery efficiency                                                                     | 98%<br>[97%; 99%] <sup>a</sup> | -       |
| Crude oil production, energy expended<br>MJ/MJ <sub>crude</sub>                               |                                | 0.1152  |
| Flaring and fugitive emissions<br>g CO <sub>2</sub> e/MJ <sub>crude</sub>                     |                                | 0.0344  |
| Refining efficiency for gasoline                                                              | 89%<br>[97%; 90%]              | -       |
| Crude refining, gasoline production, energy expended MJ/MJ <sub>crude</sub>                   | 0.128                          | 0.0820  |
| Electricity consumed by pumping operations for fuel depoting<br>MJ electricity/MJ of gasoline | NA                             | 0.00084 |
| Gasoline loss factor in local distribution<br>MJ/MJ gasoline                                  | 0.0008<br>[0.0002; 0.0017]     | 0.0004  |
| Electricity consumed for fuel dispensing at retail site<br>MJ electricity/MJ of gasoline      | NA                             | 0.0034  |
| Gasoline loss factor during gasoline dispensing<br>MJ/MJ gasoline                             | NA                             | 0.0008  |

<sup>a</sup> The values in the square brackets indicate the P10 and P90 of the parameters.

1.2 Natural gas production pathways

Table S3 summarizes the key parameters of conventional and shale natural gas (NG) production pathways in the U.S. (from GREET).<sup>18-20</sup>

**Table S3.** Recovery efficiency, processing efficiency, CH<sub>4</sub> leakage, and compression efficiency of conventional and shale natural gas production pathways

| Parameter                                                | GREET                                |                         | JEC v5 (Example)                               |
|----------------------------------------------------------|--------------------------------------|-------------------------|------------------------------------------------|
|                                                          | Conventional natural gas             | Shale natural gas       | Conventional natural gas imported from Russia* |
| Recovery efficiency                                      | 97.5%<br>[95.4%; 99.5%] <sup>a</sup> | 97.6%<br>[95.5%; 99.6%] |                                                |
| Processing efficiency                                    | 97.4%<br>[95.3%; 99.3%]              |                         |                                                |
| Extraction and processing, MJ/MJ <sub>NG</sub>           | -                                    | -                       | 0.02                                           |
| CH <sub>4</sub> leakage, g/mmBtu                         | 82.632                               | 87.891                  |                                                |
| CO <sub>2</sub> venting, %                               | -                                    | -                       | 1%<br>0.0796 (extraction)                      |
| CH <sub>4</sub> losses, g/MJ <sub>NG</sub>               |                                      |                         | 0.0084 (long distance pipeline)                |
| Compression efficiency, electric compressor              | 97.9%<br>[97.3%; 98.4%]              |                         | -                                              |
| Compressors powered by gas turbine fueled by natural gas | -                                    | -                       | ~30%                                           |

<sup>a</sup> The values in the square brackets indicate the P10 and P90 of the parameters.

Europe is a significant gas producer, mainly in the Netherlands and the UK (North Sea) and also in Denmark, Germany, Italy, and Romania (Note: The UK is included in *JEC v5* as part of Europe as figures were calculated before Brexit). Demand, however, far outstrips domestic production and current statistics show how the share of NG imports has increased in the most recent years. Therefore, in the second and third decades of this century, JEC has assumed that any extra supplies to Europe will most likely come from either the Middle East or Russia. Bringing this gas to Europe will involve either new pipelines or LNG schemes. We have therefore considered two main options:

- “Piped” gas transported to Europe via long-distance pipeline. In practice this represents additional availability from Russia or new sources in Central Asia.
- “Remote” gas from various producing regions (particularly the Arabian Gulf) either shipped into Europe as LNG or transformed at the source into liquid fuels.

The energy associated with extraction and processing varies considerably with the producing region. This reflects different gas qualities, practices and climatic conditions. For extraction, most of the energy is supplied directly in the form of natural gas (typically through an on-site power plant). Processing can take place near the wellhead or, as is common in Russia, at a central location where light hydrocarbons can be readily used as

\* Natural gas from Russia transported to EU by pipeline (4300 km to EU border and 700 km inside EU).

chemical feedstocks. In these cases, the energy supply may be mixed and include various hydrocarbon fuels as well as electricity from the local grid. Based on the various sources of information available, we have used a median figure of 2% of the processed gas energy with a range of 1% to 4%. We have not included any term for associated condensates, postulating that their production and use would globally be energy/GHG neutral (compared to alternative sources). In addition to the GHG emissions from energy use, we have included 1% volume venting as CO<sub>2</sub> and 0.4% volume of methane losses. Transportation accounts for the largest part of the energy requirement because of the large distances involved. Western Siberian fields are about 5,000 km from Europe (4,300 km to the EU border, which represents a mix of three corridors, and 700 km inside EU), whereas typical future southwest Asian locations may be 4,000 km away. For the supply of marginal piped natural gas, a transport distance of 4,000 km has been assumed, representing typical future Southwest Asian locations.

Beside the extraction process itself, processing is required to separate heavier hydrocarbons, eliminate contaminants such as H<sub>2</sub>S, and separate inert gases, particularly CO<sub>2</sub>, when they are present in large quantities. The associated energy and GHG figures are extremely variable depending on the location, climatic conditions, and quality of the gas. The figures used in *JEC v5* are reasonable averages; the large variability being reflected in the wide range. We have not accounted for any credit or debit for the associated heavier hydrocarbons, postulating that their production and use would be globally energy and GHG neutral compared to alternative sources. The figure of 1% for venting of separated CO<sub>2</sub> reflects the low CO<sub>2</sub> content of the gas sources typically available to Europe. For sources with higher CO<sub>2</sub> content, it is assumed that re-injection will be common at the 2025+ horizon.

Combined leakages in the transportation system result in some methane losses directly emitted to the atmosphere. Although it has often been reported that such losses are very high in the Russian system, comprehensive studies such as conducted by Ruhrgas and Gazprom and by the Wuppertal Institute, give a more moderate picture. Based on the latter source, *JEC v5* assumes a loss of 0.13% of the transported gas per 1000 km.

1.3 Bioethanol production pathways

The key life-cycle stages for bioethanol production pathways are biomass feedstock production and conversion of the feedstock to bioethanol. Table S4 summarizes key farming parameters for ethanol production from corn, corn stover, sweet sorghum, sugarcane, and willow.<sup>21-23</sup>

Table S5 summarizes the efficiencies, energy use, co-product yields, and chemical use in corn and cellulosic ethanol plants.<sup>22-25</sup>

Table S4. Energy use, fertilizer application rates, and N<sub>2</sub>O emission conversion rates for corn farming and corn stover harvest/collection

|                                                 | GREET                             |                                       |                                  | JEC v5                                               |                                                                                                     |                                      |
|-------------------------------------------------|-----------------------------------|---------------------------------------|----------------------------------|------------------------------------------------------|-----------------------------------------------------------------------------------------------------|--------------------------------------|
| Parameter                                       | Corn<br>Btu/bushel or<br>g/bushel | Corn<br>stover<br>Btu/ton or<br>g/ton | Sugarcane<br>Btu/ton or<br>g/ton | Corn imported<br>from U.S. MJ/MJ<br>EtOH, g/MJ grain | Wheat straw<br>MJ/MJEtOH,<br>g/MJ Straw                                                             | Sugar beet<br>MJ/MJ EtOH,<br>g/MJ SB |
| Direct energy use for bio-feedstock farming     | 6,924<br>[5,687; 8,720]           | 223,592                               | 979.6                            | 0.18 farming<br>MJ/MJ <sub>EtOH</sub> *              | -<br>(0.07 MJ/ MJ <sub>EtOH</sub> Straw<br>baling and collection,<br>including fertilizer<br>debit) | 0.10<br>MJ/MJ <sub>EtOH</sub>        |
| Diesel use                                      | 3,409<br>[2,799; 4,292]           | 223,592                               | 33,008                           | 0.025                                                | 0.0096                                                                                              | 0.0105                               |
| N fertilizer application                        | 383<br>[290; 473]                 | 3,183                                 | 889                              | 1.18                                                 | -                                                                                                   | 0.35                                 |
| P fertilizer application                        | 139<br>[74; 222]                  | 2,273                                 | 294                              | 0.36                                                 | 0.13                                                                                                | 0.15                                 |
| K fertilizer application                        | 146<br>[35; 286]                  | 13,641                                | 1,368                            | 0.42                                                 | 0.71                                                                                                | 0.26                                 |
| Limestone application                           | 1,290<br>[1162; 1418]             | 0                                     | 4,717                            | 0.88                                                 | -                                                                                                   | 0.61                                 |
| N <sub>2</sub> O conversion rate of N inputs: % | 1.225                             | 1.225                                 | 1.225                            | -                                                    | -                                                                                                   | -                                    |
| N <sub>2</sub> O field emissions                |                                   |                                       |                                  | 0.034                                                | -                                                                                                   | 0.0126                               |

Table S5. Ethanol yields, co-product yields, and enzyme and yeast usage in corn-based and corn stover-based ethanol production

|                                             | GREET                              |                                  |                                    | JEC v5                                                     |
|---------------------------------------------|------------------------------------|----------------------------------|------------------------------------|------------------------------------------------------------|
| Parameter                                   | Corn                               | Corn stover                      | Sugarcane                          | Corn imported from U.S.                                    |
| Ethanol yield:                              | 2.9 gal/bushel<br>[2.8; 2.9]       | 85.0 gal/dry ton<br>[74.1; 95.5] | 21.4 gal/wet tonne<br>[19.3; 23.6] | 0.602 MJ <sub>EtOH</sub> /MJ <sub>corn</sub>               |
| Ethanol plant fossil energy use:            | 26,856 Btu/gal<br>[19,844; 33,941] | 180 Btu/gal                      | 300 Btu/gal<br>[269.2; 330.6]      | 1.08 MJ/MJ <sub>EtOH</sub>                                 |
| Dried distillers grains with solubles yield | 5.6 lb/gal<br>[5.0; 6.1]           | 0 lb/gal                         | 0 lb/gal                           | 0.012 kg <sub>DDGS</sub> (@7% moisture)/MJ <sub>EtOH</sub> |
| Co-produced electricity                     | 0 kWh/gal                          | 2.4 kWh/gal<br>[1.9; 3.7]        | 3.5 kWh/gal<br>[0.5; 9.0]          | -                                                          |
| Enzyme use                                  | 7.9 g/gal<br>[7.3; 8.7]            | 106.7 g/gal<br>[116.5; 878.9]    | 0 g/gal                            | -                                                          |
| Yeast use                                   | 2.7 g/gal<br>[2.5; 3.0]]           | 26.6 g/gal<br>[22.6; 31.2]       | 0 g/gal                            | -                                                          |
| Sulfuric acid                               | 4.7 g/gal                          | 346.2 g/gal                      | 0 g/gal                            | -                                                          |
| Ammonia                                     | 17.8 g/gal                         | 41.5 g/gal                       | 0 g/gal                            | -                                                          |

\* Additional 0.06 MJ/MJ<sub>EtOH</sub> from grain drying, storage and handling

1.4 Synthetic diesel: Fischer-Tropsch diesel (FTD) and pyrolysis based pathways

Table S6 summarizes the key parameters for forest residue-based FTD production pathways.<sup>26</sup>

1.5 Hydrogen production pathways

Table S7 summarizes the key parameters for NG SMR- and electrolysis-based hydrogen production pathways.<sup>27</sup>

1.6 Electricity generation

The emissions from electricity generation depend on the fuels and technologies used. Electricity generated from fossil fuels (coal, natural gas, and oil, etc.) incurs higher GHG emissions than electricity derived from renewable energy sources, such as wind and solar. The technologies used for electricity generation also play an important role due to differences in power generation efficiencies and combustion characteristics. GREET estimates the emissions from the power generation sector by investigating the shares and emissions of the major electricity generation fuels and technologies used in the U.S.<sup>28</sup>

First, the power generation efficiencies and emission factors of VOC, CO, NO<sub>x</sub>, PM, CH<sub>4</sub>, and N<sub>2</sub>O are estimated for each combination of fuel and power generation technology. The emissions factors are estimated in two steps. First, plant-level emission factors are estimated by dividing the total emissions from a power plant that uses one dominant fuel and technology by the net electricity generation from the same plant. Second, national average emission factors are estimated as the average of the plant-level emission factors weighted by the net power generation. The CO<sub>2</sub> emissions factor is estimated for each fuel based on its carbon balance, using its power generation efficiency and the emission factors of the other pollutants. The GHG emissions of the power generation sector are then

Table S6. Key parameters of forest residue-based FTD and pyrolysis production pathways

|                            | GREET                 | JEC v5                |                             |
|----------------------------|-----------------------|-----------------------|-----------------------------|
| Parameter                  | Forest residue to FTD | Forest residue to FTD | Forest residue to pyrolysis |
| Fuel production efficiency | 50%                   | 45.1%                 | 61.6%                       |

Table S7. Key parameters of NG- and water electrolysis-hydrogen production pathways at central plants

|                                               | GREET                   |                                      | JEC v5                                                |                                                                  |
|-----------------------------------------------|-------------------------|--------------------------------------|-------------------------------------------------------|------------------------------------------------------------------|
| Parameter                                     | NG to H <sub>2</sub>    | Water electrolysis to H <sub>2</sub> | NG to H2                                              | Water electrolysis                                               |
| H <sub>2</sub> production efficiency          | 72.0%<br>[66.8%; 78.1%] | 67.0%                                | 69% (on-site SMR)<br>76% (central SMR)                | 65%<br>56% (min PEM) to 80% (max SOEC)*                          |
| Energy use for CCS (kWh/ton C captured)       | 357                     | NA                                   | 1.365 MJ/MJ H <sub>2</sub>                            | NA                                                               |
| Gaseous H <sub>2</sub> compression efficiency | 90.7%<br>[89.4%; 92.0%] |                                      | 0.0537 MJ electricity/MJ H <sub>2</sub> (3 to 50 MPa) | 0.0864 MJ electricity/MJ H <sub>2</sub> (3 to 88 MPa dispensing) |

estimated based on the power generation share of each combination of fuel and technology as well as a loss factor to account for loss during electricity transmission and distribution. Results are also available for all the North American Electric Reliability Corporation (NERC) regions and all 50 states in the U.S. Table S8 lists the key parametric assumptions about electricity generation in the U.S.<sup>28</sup>

1.6.1 Key parametric assumptions of electricity generation in JEC WTT v5

- Upstream emission factors
- Efficiencies: For renewable energy sources, the raw materials are considered unlimited and the energy efficiency is considered to be (conventionally) 100%. Due to the nature of JEC, it has been assumed that new large-scale capacity will be based on the combined cycle gas turbine (CCGT) concept with an efficiency of 58%. For coal, the conventional process represents a modern steam turbine plant with an efficiency of 43.5% whereas for integrated gasification combined cycle (IGCC) plants, an average value of 48% has been used. For wood, a conventional biomass power plant turbine/small scale) is represented with an efficiency of 32%. A wood-based IGCC plant of 200 MW<sub>th</sub> is considered to have an efficiency of 48.2%, ranging down to 35.4% in the case of a 10 MW<sub>th</sub> plant. If co-fired in coal power plant, biomass is considered to reach an overall efficiency of 43.5%. For nuclear power plants, 33% is assumed.
- Transmission losses in the high voltage system are about 2.6%, while losses for medium voltage distribution add 0.9% and low voltage distribution a further 3.4%.

\* Related to LHV

Table S8. Key parametric assumptions of electricity generation in GREET

|                   | Power plant type                | Technology                 | Share | Efficiency              | CO <sub>2</sub> emissions from combustion (g/kWh) |
|-------------------|---------------------------------|----------------------------|-------|-------------------------|---------------------------------------------------|
| Fuel production   | Coal-fired power plants         |                            |       |                         |                                                   |
|                   |                                 | Boiler                     | 24.4% | 36.0%<br>[33.8%; 37.9%] |                                                   |
|                   |                                 | IGCC                       | 0.2%  | 39.0%<br>[36.0%; 42.0%] |                                                   |
|                   |                                 | Overall                    | 24.6% | 36.0%<br>[33.8%; 37.9%] | 947.4                                             |
|                   | Natural gas-fired power plants  |                            |       |                         |                                                   |
|                   |                                 | Boiler                     | 3.2%  | 34.0%<br>[31.4%; 37.0]  |                                                   |
|                   |                                 | Simple-cycle gas turbine   | 2.2%  | 34.0%<br>[26.5%; 35.0%] |                                                   |
|                   |                                 | Combined-cycle gas turbine | 30.9% | 55.0%<br>[40.1%; 61.5%] |                                                   |
|                   |                                 | Internal Combustion Engine | 0.3%  | 34.0%<br>[24.1%; 44.0%] |                                                   |
|                   |                                 | Overall                    | 36.7% | 50.0%<br>[38.4%; 53.6%] | 404.2                                             |
|                   | Residual oil-fired power plants |                            |       |                         |                                                   |
|                   |                                 | Boiler                     | 0.3%  | 35.0%<br>[32.1%; 37.7%] |                                                   |
|                   |                                 | Internal Combustion Engine | 0.0%  | 38.0%<br>[32.7%; 43.6%] |                                                   |
|                   |                                 | Gas Turbine                | 0.1%  | 32.0%<br>[22.1%; 42.0%] |                                                   |
|                   |                                 | Overall                    | 0.4%  | 35.0%<br>[30.1%; 38.2%] | 840.3                                             |
|                   | Biomass power plants            |                            |       |                         |                                                   |
|                   |                                 | Boiler                     | 0.3%  | 22.0%<br>[16.5%; 27.5%] |                                                   |
|                   |                                 | IGCC                       | 0.0%  | 40.0%<br>[38.4%; 42.1%] |                                                   |
|                   |                                 | Overall                    | 0.3%  | 22.0%<br>[16.6%; 27.5%] | -9.1                                              |
| Fuel distribution | Transmission loss (%)           | 4.86%                      |       |                         |                                                   |

Table S9. Upstream emission factors used in JEC v5 (kg CO<sub>2eq</sub>/GJ)

|           |            |      |            |                    |             |                |                 |                  |                 |          |         |
|-----------|------------|------|------------|--------------------|-------------|----------------|-----------------|------------------|-----------------|----------|---------|
| Hard coal | Brown coal | Peat | Coal gases | Petroleum products | Natural gas | Solid biofuels | Liquid biofuels | Industrial waste | Municipal waste | Biogases | Nuclear |
| 16.0      | 1.7        | 0    | 0          | 10.7               | 12.8        | 0.7            | 46.8            | 0                | 0               | 14.9     | 1.4     |

In addition to individual electricity pathways, *JEC v5* also includes different electricity mix scenarios as defined below:

**Table S10.** EU electricity production mix in JEC WTT v5 (2016 data and projections for 2030)

| % Share                   | 2016     | 2030                     |
|---------------------------|----------|--------------------------|
| Source                    | EEA 2018 | IEA NPS (2030)- WEO 2017 |
| Coal, lignite             | 21.2%    | 12.1%                    |
| Oil                       | 1.8%     | 0.6%                     |
| Natural gas               | 19.7%    | 21.0%                    |
| Nuclear                   | 25.8%    | 21.3%                    |
| Hydro                     | 10.8%    | 11.8%                    |
| Wind                      | 9.4%     | 19.7%                    |
| Solar                     | 3.5%     | 5.3%                     |
| Other non-renewable fuels | 2.2%     | 0                        |
| Other renewables          | 5.6%     | 8.2%                     |

1.7 Renewable natural gas and compressed biomethane

Renewable natural gas (RNG) can be produced from waste feedstocks such as wastewater sludge, animal manure, and municipal solid waste (MSW). The waste feedstock is collected and converted to a CH<sub>4</sub>-rich biogas via anaerobic digestion (AD). A fraction of the biogas is combusted on-site to generate heat and electricity for the facility. The remaining biogas goes through a two-step clean-up process to remove impurities including corrosive hydrogen compounds, water, low concentrations of non-methane organic compounds, and CO<sub>2</sub> to produce pipeline-quality renewable natural gas.

In GREET, the RNG is transmitted 80 km by pipeline to refueling stations.<sup>29</sup> The delivered RNG is then compressed to 28 MPa by electric compressors and eventually combusted in compressed

natural gas vehicles (CNGV).<sup>29</sup> The residue of the AD process is applied to soil as fertilizer, and a small amount of carbon in the residue is emitted as methane. For the manure AD pathway, a significant amount (62%) of the carbon in the AD residue is oxidized to CO<sub>2</sub> and released to the atmosphere, while the rest is assumed to remain sequestered in the soil. For the sludge AD pathway, a fixed sequestration factor is used to estimate the sequestered carbon, while CO<sub>2</sub> emissions from soil application of sludge AD residue are not modeled.

GREET also models current management systems as the reference cases for two waste feedstocks.<sup>29,30</sup> Energy consumption and pollutant emissions from manure management systems are taken as a credit since they are avoided if waste feedstocks are used to produce biofuels. In the reference case, manure is sent to a current management system (e.g., anaerobic lagoon, deep pit, etc.) where CH<sub>4</sub> is emitted. For manure management systems like anaerobic lagoons and deep pits, CH<sub>4</sub> emissions can be collected and are thus “controllable,” while CH<sub>4</sub> emissions from pastures and daily spread are “uncontrollable.” Sixty percent of the controllable CH<sub>4</sub> emissions are flared to reduce GHG emissions. The residue from the manure management systems is used for soil application to displace synthetic fertilizers and generate emission credits.

The reference case for sludge management is similar to the process for CNG production in the sense that it also uses AD. However, most of the generated biogas is combusted without cleanup to provide heat for the facility, and the rest is flared. In a combined heat and power (CHP) CNG production facility, some biogas is combusted after initial cleanup to provide heat and electricity, and the rest is further cleaned to produce commercial-grade natural gas. Another difference between the reference case and the CNG production case is that AD residue is landfilled in the former due to environmental concerns, thus no fertilizer displacement credits are available.

The reference case for MSW management is landfilling.

**Table S11.** Key parametric assumptions of feedstock composition for CNG production in GREET

|                 | Manure | Sludge | MSW (food waste) |
|-----------------|--------|--------|------------------|
| Moisture        | 88%    | NA     | 60%              |
| Volatile solids | 85%    | 61%    | NA               |
| Nitrogen        | 4%     | NA     | 3%               |
| Carbon          | 47%    | NA     | 48%              |

Table S12. Key parametric assumptions of compressed biomethane production in GREET

|                      |                                                           |                            | Manure                                    |                           | Sludge                 |                                       | MSW (food waste) |                             |  |
|----------------------|-----------------------------------------------------------|----------------------------|-------------------------------------------|---------------------------|------------------------|---------------------------------------|------------------|-----------------------------|--|
| Feedstock production | Counterfactual scenario (avoided emissions <sup>4</sup> ) |                            | Current manure management                 |                           | AD with biogas flaring |                                       | MSW landfilling  |                             |  |
| Fuel production      | Anaerobic digesters                                       | Thermal energy requirement | 1.16E+05                                  | Btu/wet ton               | 5.15E+00               | MJ/kg VS                              | 3.51E+05         | Btu/wet ton                 |  |
|                      |                                                           | Electricity requirement    | 1.20E+01                                  | kWh/wet ton               | 1.26E+00               | MJ/kg VS                              | 2.13E+05         | Btu/wet ton                 |  |
|                      |                                                           | Methane yield              | 3.14E+00                                  | ft <sup>3</sup> /lb VS    | 3.72E-01               | m <sup>3</sup> CH <sub>4</sub> /kg VS | 8.84E+01         | m <sup>3</sup> /wet ton     |  |
|                      | Soil application of digestate                             | Carbon Sequestration       | 5.21E-01                                  | lb CO <sub>2</sub> /lb TS | 1.50E-01               | kg CO <sub>2</sub> /kg VS             | 3.28E+01         | kg CO <sub>2</sub> /wet ton |  |
|                      |                                                           | CH <sub>4</sub> emissions  | 1.24E-04                                  | lb CH <sub>4</sub> /lb TS | 3.89E-05               | m <sup>3</sup> CH <sub>4</sub> /kg VS | 2.33E+00         | g CH <sub>4</sub> /wet ton  |  |
|                      |                                                           | N displaced                | 4.10E-02                                  | lb /lb TS                 | 4.10E-02               | kg CO <sub>2</sub> /kg VS             | 5.08E+00         | kg/wet ton                  |  |
|                      |                                                           | P displaced                | 0.00E+00                                  | lb /lb TS                 | 5.30E-02               | kg CO <sub>2</sub> /kg VS             | 8.31E-01         | kg/wet ton                  |  |
|                      |                                                           | K displaced                | 0.00E+00                                  | lb /lb TS                 | 4.00E-03               | kg CO <sub>2</sub> /kg VS             | 2.51E+00         | kg/wet ton                  |  |
|                      |                                                           | Biogas cleanup             | NG processing Efficiency                  | 94.4%                     |                        |                                       |                  |                             |  |
|                      |                                                           |                            | Leakage                                   | 2%                        |                        |                                       |                  |                             |  |
|                      | Co-product                                                | Electricity                | 2.51E-02                                  | MJ/MJ CNG                 | NA                     |                                       |                  |                             |  |
|                      |                                                           | Allocation                 | Energy-based allocation                   |                           |                        |                                       |                  |                             |  |
| Fuel distribution    | NG distribution                                           | Distribution mode          | Pipeline                                  |                           |                        |                                       |                  |                             |  |
|                      |                                                           | Distance                   | 8.05E+01 km                               |                           |                        |                                       |                  |                             |  |
|                      |                                                           | NG on-site compression     | 1.60E-02 MJ/MJ NG<br>[1.50E-02; 1.60E-02] |                           |                        |                                       |                  |                             |  |
|                      |                                                           | NG off-site compression    | 2.20E-02 MJ/MJ NG<br>[2.10E-02; 2.20E-02] |                           |                        |                                       |                  |                             |  |
|                      |                                                           |                            |                                           |                           |                        |                                       |                  |                             |  |

<sup>4</sup> Avoided emissions include avoided methane emissions from soil application of digestate for anaerobic digestion of animal manure and sludge, and avoided methane emissions from landfills of MSW.

In *JEC v5*, the organic fraction to biogas follows the same approach as described above for GREET. The conversion level of the fermentation process is deemed to be ~70%, and the moisture content varies depending on the feedstock as it does in GREET (e.g., 85% for manure). Typically, the composition is 60%/40% methane and CO<sub>2</sub> depending on the type of feedstock, with small amounts of other substances such as H<sub>2</sub>

(0%-1%), N<sub>2</sub> (0%-7%), H<sub>2</sub>S (0%-1%) and traces of NH<sub>3</sub>, as well as water vapor, before it goes through the upgrading step (removing CO<sub>2</sub> and H<sub>2</sub>S, among others). The treated biomethane is available at ~0.9 MPa and compressed up to 25 MPa to refuel a vehicle. The main parameters for JEC are detailed below:

Table S13. Key parametric assumptions for compressed biomethane production in *JEC v5*

|                      |                                                  |                           | Manure                   | Sewage sludge | MSW    |
|----------------------|--------------------------------------------------|---------------------------|--------------------------|---------------|--------|
| Feedstock production | Counterfactual scenario (avoided emissions)      | Current manure management | Closed digestate storage |               |        |
| Fuel production      | Production & conditioning at source              |                           |                          |               |        |
|                      | GHG emissions credit from avoided manure storage |                           |                          |               |        |
|                      | CH <sub>4</sub> emissions                        | g/MJ <sub>manure</sub>    | -1.4700                  |               |        |
|                      | N <sub>2</sub> O emissions                       | g/MJ <sub>manure</sub>    | -0.0279                  |               |        |
|                      | Transportation to market                         |                           |                          |               |        |
|                      | Manure transport (Road)                          |                           |                          |               |        |
|                      | Distance                                         | km                        | 5                        |               |        |
|                      | Transformation near market                       |                           |                          |               |        |
|                      | Fermenter (closed digestate storage)             |                           |                          |               |        |
|                      | Raw gas yield                                    | MJ/MJ <sub>waste</sub>    | 0.4620                   | 0.4620        | 0.7073 |
|                      | Heat to process                                  | MJ/MJ <sub>rawgas</sub>   | 0.0909                   | 0.4767        | 0.0976 |
|                      | Electricity (EU-mix, LV) to process              | MJ/MJ <sub>rawgas</sub>   | 0.0182                   | 0.0688        | 0.0293 |
|                      | Internal heat generation using own raw gas       |                           |                          |               |        |
|                      | Efficiency                                       | %                         | 90.0%                    | 90.0%         | 90.0%  |
|                      | CH <sub>4</sub> emissions                        | g/MJ <sub>heat</sub>      | 0.0056                   | 0.0056        | 0.0056 |
|                      | N <sub>2</sub> O emissions                       | g/MJ <sub>heat</sub>      | 0.0011                   | 0.0011        | 0.0011 |
|                      | Upgrading                                        |                           |                          |               |        |
|                      | Upgraded gas yield                               | MJ/MJ <sub>rawgas</sub>   | 0.9700                   |               |        |
|                      | Electricity (EU-mix, LV)                         | MJ/MJ <sub>gas</sub>      | 0.0300                   |               |        |
| Fuel distribution    | Conditioning and distribution                    |                           |                          |               |        |
|                      | Compression and dispensing                       |                           |                          |               |        |
|                      | Electricity (EU-mix, MV)                         | MJ/MJ <sub>CBM</sub>      | 0.0220                   | 0.0220        | 0.0220 |
|                      | CH <sub>4</sub> emissions                        | g/MJ <sub>CBM</sub>       | 0.0113                   | 0.0001        | 0.0001 |

**1.7.1 Biodiesel and renewable diesel from oil feedstocks.** Soy oil extracted from soybean can be converted to either biodiesel via transesterification or renewable diesel via hydrotreating. GREET models the entire life-cycle of soybean oil-based biodiesel and renewable diesel, including soybean farming, oil extraction, fuel production, fuel transportation and transmission, and fuel combustion. Key parametric assumptions of biodiesel and renewable diesel production are listed in Tables S14 and S15, respectively.

Another common feedstock for biodiesel production is tallow, which has high free fatty acids content. Tallow is treated as byproduct from meat production, hence the burdens from upstream processes include animal feed production, animal farming, and slaughtering. The system boundary of tallow-based renewable diesel includes rendering, tallow transport, renewable diesel production, and renewable diesel transportation and combustion.

Table S14. Key parametric assumptions of biodiesel production in GREET<sup>31</sup>

|                      |                                            | Soybean based biodiesel       |                           | Tallow based biodiesel |                                     |
|----------------------|--------------------------------------------|-------------------------------|---------------------------|------------------------|-------------------------------------|
| Feedstock production |                                            | Soybean farming               |                           | Tallow rendering       |                                     |
|                      | N fertilizer                               | 2.0<br>[0.8; 3.7]             | g/dry kg soybean          |                        |                                     |
|                      | P <sub>2</sub> O <sub>5</sub> fertilizer   | 7.9<br>[0.5; 12.3]            | g/dry kg soybean          |                        |                                     |
|                      | K <sub>2</sub> O fertilizer                | 12.6                          | g/dry kg soybean          |                        |                                     |
|                      | Herbicide                                  | 0.8                           | g/dry kg soybean          |                        |                                     |
|                      | Insecticide                                | 0.02                          | g/dry kg soybean          |                        |                                     |
|                      | Diesel fuel                                | 579                           | kJ/dry kg soybean         |                        |                                     |
|                      | Gasoline                                   | 129                           | kJ/dry kg soybean         |                        |                                     |
|                      | Liquefied petroleum gas                    | 32.4                          | kJ/dry kg soybean         |                        |                                     |
|                      | Natural gas                                | 41.6                          | kJ/dry kg soybean         | 4.0                    | MJ/kg tallow                        |
|                      | Electricity                                | 39.5                          | kJ/dry kg soybean         | 1.2                    | MJ/kg tallow                        |
|                      | Residual oil                               | -                             | -                         | 2.3                    | MJ/kg tallow                        |
| Fuel production      | Oil extraction                             |                               |                           | -                      |                                     |
|                      | Inputs                                     |                               |                           |                        |                                     |
|                      | Feedstock                                  | 4.65                          | dry kg soybean/kg soy oil |                        |                                     |
|                      | Residual oil                               | 0.06                          | MJ/kg soy oil             |                        |                                     |
|                      | Diesel fuel                                | 0.03                          | MJ/kg soy oil             |                        |                                     |
|                      | Natural gas                                | 4.01                          | MJ/kg soy oil             |                        |                                     |
|                      | Coal                                       | 1.97                          | MJ/kg soy oil             |                        |                                     |
|                      | Electricity                                | 0.86                          | MJ/kg soy oil             |                        |                                     |
|                      | Hexane                                     | 0.11                          | MJ/kg soy oil             |                        |                                     |
|                      | Biomass                                    | 0.06                          | MJ/kg soy oil             |                        |                                     |
|                      | Landfill gas                               | 0.03                          | MJ/kg soy oil             |                        |                                     |
|                      | Co-product                                 |                               |                           |                        |                                     |
|                      | Soy meal                                   | 3.63                          | dry kg per kg of soy oil  |                        |                                     |
|                      | Co-Product allocation                      | Mass-based allocation         |                           |                        |                                     |
|                      | Biodiesel production (Transesterification) |                               |                           |                        |                                     |
|                      | Inputs                                     |                               |                           |                        |                                     |
|                      | Feedstock                                  | 1.0<br>[0.98; 1.02]           | kg soy oil/kg biodiesel   | 1.1<br>[1.0; 1.2]      | kg rendered tallow/<br>kg biodiesel |
|                      | Diesel fuel                                | 23.5                          | kJ/kg biodiesel           | -                      | kJ/kg biodiesel                     |
|                      | Natural gas                                | 1179.5                        | kJ/kg biodiesel           | 2162.7                 | kJ/kg biodiesel                     |
|                      | Electricity                                | 146.7                         | kJ/kg biodiesel           | 310.6                  | kJ/kg biodiesel                     |
|                      | Methanol                                   | 2176.0<br>[1891; 2456]        | kJ/kg biodiesel           | 2209.5<br>[1621; 2787] | kJ/kg biodiesel                     |
|                      | Nitrogen (grams)                           | 2.1                           | kJ/kg biodiesel           | 6.8                    | kJ/kg biodiesel                     |
|                      | Sodium hydroxide (grams)                   | 0.4                           | kJ/kg biodiesel           | 0.7                    | kJ/kg biodiesel                     |
|                      | Sodium methoxide (grams)                   | 4.9                           | kJ/kg biodiesel           | 5.2                    | kJ/kg biodiesel                     |
|                      | Hydrochloric acid (grams)                  | 2.5                           | kJ/kg biodiesel           | 3.6                    | kJ/kg biodiesel                     |
|                      | Phosphoric acid (grams)                    | 0.4                           | kJ/kg biodiesel           | 0.3                    | kJ/kg biodiesel                     |
|                      | Citric acid (grams)                        | -                             | kJ/kg biodiesel           | 0.4                    | kJ/kg biodiesel                     |
|                      | Co-Product                                 |                               |                           |                        |                                     |
|                      | Glycerin                                   | 90.5                          | g/kg biodiesel            | 81.5                   | g/kg biodiesel                      |
|                      | Fatty acids and distillation bottoms       | 7.3                           | g/kg biodiesel            | 101.3                  | g/kg biodiesel                      |
|                      | Co-product allocation                      | Market value-based allocation |                           |                        |                                     |

Vegetable oils can be converted to hydrocarbon fuels over catalytic beds in the presence of hydrogen. Renewable diesel produced from this technology is also known as hydrotreated vegetable oil (HVO), or hydroprocessed esters and fatty acid (HEFA).

1.7.2 Soybeans to biodiesel in JEC v5.

For comparison purposes, the table S15 presents the pathway in which soy beans are imported from USA into Europe and glycerine is used to generate biogas consumed internally during the biofuel production process. At present the main co-products of biofuel manufacture are rapeseed meal from biodiesel and Distiller's Dried Grain with Solubles (DDGS) from cereals-ethanol rich in protein (although not as rich as soybean meal, the main protein concentrate feed in EU). Therefore, JEC

considers that DDGS substitute a mix of soybean meal and carbohydrate feeds as a credit in the total GHG intensity estimate (In JEC, the main marginal source of carbohydrate feed is cereals, which we represent by EU feed-wheat, whilst the main marginal source of protein is clearly soybean meal, as a weighted mix of soybeans from EU, Argentina, Brazil, and USA).

| Table S15. Key parametric assumptions of renewable diesel production in GREET <sup>32</sup> |                         |                        |
|---------------------------------------------------------------------------------------------|-------------------------|------------------------|
| Inputs                                                                                      | GREET                   |                        |
| Feedstock                                                                                   | 1.2                     | kg soy oil/kg fuel     |
| Electricity                                                                                 | 221.3                   | kJ/kg renewable diesel |
| Hydrogen                                                                                    | 3892.1                  | kJ/kg renewable diesel |
| NG                                                                                          | 192.0                   | kJ/kg renewable diesel |
| Co-products                                                                                 |                         |                        |
| Propane fuel mix                                                                            | 2549.3                  | kJ/kg renewable diesel |
| Co-product allocation                                                                       | Energy-based allocation |                        |

Table S16. Key parametric assumptions of biodiesel production in JEC v5

| Feedstock production | Biodiesel production                                      |                                       | Soybean  | Tallow | UCO |
|----------------------|-----------------------------------------------------------|---------------------------------------|----------|--------|-----|
| Fuel production      | Production & conditioning at source                       |                                       |          |        |     |
|                      | Soy cultivation                                           |                                       |          |        |     |
|                      | Fertilizers                                               | g/MJ <sub>soy bean</sub>              |          |        |     |
|                      | N (as N)                                                  |                                       | 0.08     |        |     |
|                      | P (as P <sub>2</sub> O <sub>5</sub> )                     |                                       | 0.71     |        |     |
|                      | K (as K <sub>2</sub> O)                                   |                                       | 0.69     |        |     |
|                      | CaCO <sub>3</sub> (as CaO)                                |                                       | 4.16     |        |     |
|                      | Pesticides                                                | g/MJ <sub>soy bean</sub>              | 0.06     |        |     |
|                      | Seeding material                                          | g/MJ <sub>soy bean</sub>              | 1.33     |        |     |
|                      | Diesel                                                    | MJ/MJ <sub>soy bean</sub>             | 0.031    |        |     |
|                      | CH <sub>4</sub> emissions                                 | g/MJ <sub>soy bean</sub>              | 0.000040 |        |     |
|                      | CO <sub>2</sub> from soil neutralisation                  | g/MJ <sub>soy bean</sub>              | 3.094    |        |     |
|                      | N <sub>2</sub> O field emissions                          | g/MJ <sub>soy bean</sub>              | 0.0428   |        |     |
|                      | Beans to EU: Soy beans drying (13%), storage and handling |                                       |          |        |     |
|                      | Diesel                                                    | MJ/MJ <sub>soy bean</sub>             | 0.0006   |        |     |
|                      | NG                                                        | MJ/MJ <sub>soy bean</sub>             | 0.0011   |        |     |
|                      | LPG (LRLP1)                                               | MJ/MJ <sub>soy bean</sub>             | 0.0006   |        |     |
|                      | Electricity (EU-mix, MV)                                  | MJ/MJ <sub>soy bean</sub>             | 0.00023  |        |     |
|                      | Transformation at source                                  |                                       |          |        |     |
|                      | Soy beans drying (13 to 11%)                              |                                       |          |        |     |
|                      | NG                                                        | MJ/MJ <sub>soy bean</sub>             | 0.0029   |        |     |
|                      | Raw oil production (meal export)                          |                                       |          |        |     |
|                      | Raw oil yield                                             | MJ <sub>oil</sub> /MJ <sub>seed</sub> | 0.348    |        |     |
|                      | Soya meal                                                 | kg/MJ <sub>oil</sub>                  | 0.110    |        |     |
|                      | Heat to process                                           | MJ/MJ <sub>oil</sub>                  | 0.082    |        |     |
|                      | Electricity (EU-mix, MV)                                  | MJ/MJ <sub>oil</sub>                  | 0.015    |        |     |
|                      | n-Hexane                                                  | MJ/MJ <sub>oil</sub>                  | 0.004    |        |     |
|                      | CO <sub>2</sub> emissions (from n-hexane)                 | g/MJ <sub>oil</sub>                   | 0.248    |        |     |
|                      | Credit for meal                                           |                                       |          |        |     |
|                      | Animal feed substitution                                  |                                       |          |        |     |
|                      | 1 kg meal substitutes:                                    |                                       |          |        |     |
|                      | Dry corn                                                  | kg/kg <sub>Meal</sub>                 | -0.976   |        |     |
|                      | Transportation to market                                  |                                       |          |        |     |
|                      | Soy oil long distance transport                           |                                       |          |        |     |
|                      | Inland/coastal tanker (1.2 kt)                            |                                       |          |        |     |
|                      | Distance                                                  | km                                    | 562      |        |     |
|                      | Sea-going tanker (23 kt)                                  |                                       |          |        |     |
|                      | Distance                                                  | km                                    | 11107    |        |     |
|                      | Soy beans long distance transport                         |                                       |          |        |     |
|                      | Inland ship                                               |                                       |          |        |     |
|                      | Distance                                                  | km                                    | 615      |        |     |
|                      | Sea-going product carrier (Panamax)                       |                                       |          |        |     |
|                      | Distance                                                  | km                                    | 9381     |        |     |
|                      | HFO                                                       | MJ/t.km                               | 0.0078   |        |     |
|                      | Carcass transport                                         |                                       | -        | -      |     |
|                      | Road truck                                                |                                       |          |        |     |
|                      | Distance                                                  | km                                    |          | 30     |     |
|                      | Transformation near market                                |                                       |          |        |     |
|                      | Tallow production (rendering plant)                       |                                       |          |        |     |
|                      | Tallow yield                                              | kg/kg <sub>dry carcass</sub>          |          | 0.2865 |     |
|                      | Electricity (EU-mix, MV)                                  | MJ/MJ <sub>tallow</sub>               |          | 0.0029 |     |
|                      | HFO                                                       | MJ/MJ <sub>tallow</sub>               |          | 0.0064 |     |
|                      | NG                                                        | MJ/MJ <sub>tallow</sub>               |          | 0.0521 |     |
|                      | Tallow transport                                          |                                       |          |        |     |
|                      | Road truck                                                | km                                    |          | 150    |     |

|  |                                                                       |                                            |  |          |          |
|--|-----------------------------------------------------------------------|--------------------------------------------|--|----------|----------|
|  | <b>Biodiesel production</b>                                           |                                            |  |          |          |
|  | Biodiesel yield                                                       | MJ <sub>Biodiesel</sub> /MJ <sub>oil</sub> |  | 0.965    | 0.965    |
|  | Methanol (feed)                                                       | MJ/MJ <sub>Biodiesel</sub>                 |  | 0.056    | 0.056    |
|  | CO <sub>2</sub> emissions (fossil carbon in methanol)                 | g/MJ <sub>Biodiesel</sub>                  |  | 3.889    | 3.889    |
|  | Electricity (EU-mix, MV)                                              | MJ/MJ <sub>Biodiesel</sub>                 |  | 0.0068   | 0.0068   |
|  | NG                                                                    | MJ/MJ <sub>Biodiesel</sub>                 |  | 0.0471   | 0.0471   |
|  | H <sub>3</sub> PO <sub>4</sub>                                        | g/MJ <sub>Biodiesel</sub>                  |  | 0.047    | 0.047    |
|  | KOH                                                                   | g/MJ <sub>Biodiesel</sub>                  |  | 0.427    | 0.427    |
|  | H <sub>2</sub> SO <sub>4</sub>                                        | g/MJ <sub>Biodiesel</sub>                  |  | 0.295    | 0.295    |
|  | Heat surplus (used in process)                                        | MJ/MJ <sub>Biodiesel</sub>                 |  | -0.032   | -0.032   |
|  | K fertiliser production                                               | g/MJ <sub>Biodiesel</sub>                  |  | -0.381   | -0.381   |
|  | <i>K fertiliser credit based on alternative mainstream production</i> |                                            |  |          |          |
|  | <b>Methanol production</b>                                            |                                            |  |          |          |
|  | NG                                                                    | MJ/MJ <sub>Methanol</sub>                  |  | 1.463    | 1.463    |
|  | CH <sub>4</sub> emissions                                             | g/MJ <sub>Methanol</sub>                   |  | 0.000083 | 0.000083 |

1.7.3 Per MJ WTT and Combustion Results

Table S17. WTT and combustion results of liquid fuel spark ignition (SI) ICEVs (g CO<sub>2</sub>e/MJ)

|                     |                     | Feedstock production | Fuel production | Combustion | Biogenic carbon | Total | P10  | P90  |
|---------------------|---------------------|----------------------|-----------------|------------|-----------------|-------|------|------|
| Petroleum gasoline  | GREET               | 6.1                  | 12.6            | 73.2       | 0.0             | 91.9  | 89.5 | 96.1 |
|                     | JEC v5              | 10.5                 | 6.5             | 73.4       | 0.0             | 90.4  |      |      |
| EtOH from corn      | GREET               | 21.8                 | 29.6            | 71.5       | -71.0           | 51.8  | 45.6 | 59.8 |
|                     | JEC v5              | 34.8                 | 20.7            | 71.4       | -71.4           | 55.6  |      |      |
| EtOH from sugarcane | GREET               | 15.2                 | 10.4            | 71.5       | -71.0           | 26.1  | 22.7 | 29.9 |
|                     | JEC v5              | Not available        |                 |            |                 |       |      |      |
| Cellulosic EtOH     | GREET <sup>a</sup>  | 7.0                  | 4.6             | 71.5       | -71.0           | 12.1  | 9.4  | 28.5 |
|                     | JEC v5 <sup>b</sup> | 14.1                 | 3.7             | 71.4       | -71.4           | 17.8  |      |      |

a: From corn stover

b: From wheat straw

Table S18. WTT and combustion results of liquid fuel compression ignition (CI) ICEVs (g CO<sub>2</sub>e/MJ)

|                                              |        | Feedstock production | Fuel production | Combustion | Biogenic carbon | Total | P10  | P90  |
|----------------------------------------------|--------|----------------------|-----------------|------------|-----------------|-------|------|------|
| Diesel                                       | GREET  | 7.1                  | 7.6             | 75.7       | 0.0             | 90.3  | 85.2 | 94.1 |
|                                              | JEC v5 | 10.8                 | 8.1             | 73.2       | 0.0             | 92.1  |      |      |
| FAME from soybean                            | GREET  | 9.2                  | 21.0            | 76.5       | -72.1           | 34.7  | 30.9 | 38.3 |
|                                              | JEC v5 | 48.7                 | 7.3             | 76.2       | -76.2           | 55.9  |      |      |
| FAME from canola/rapeseed                    | GREET  | 22.2                 | 11.2            | 76.5       | -75.8           | 34.1  | 29.6 | 36.8 |
|                                              | JEC v5 | 53.0                 | -4.6            | 76.2       | -76.2           | 48.4  |      |      |
| FAME from tallow                             | GREET  | 0.0                  | 19.5            | 76.5       | -72.1           | 23.9  | 20.3 | 27.8 |
|                                              | JEC v5 | 5.3                  | 8.5             | 76.2       | -76.2           | 13.8  |      |      |
| RD/HVO from soybean                          | GREET  | 9.1                  | 11.4            | 73.3       | -72.6           | 21.2  | 20.3 | 24.7 |
|                                              | JEC v5 | 84.1                 | -23.9           | 70.8       | -70.8           | 60.2  |      |      |
| RD/HVO from canola/rapeseed                  | GREET  | 18.4                 | 10.8            | 73.3       | -72.6           | 30.0  | 28.9 | 31.0 |
|                                              | JEC v5 | 53.0                 | -1.0            | 70.8       | -70.8           | 51.9  |      |      |
| RD/HVO from UCO                              | GREET  | 10.8                 | 10.1            | 73.3       | -72.6           | 21.6  | 20.2 | 25.3 |
|                                              | JEC v5 | 0.0                  | 11.1            | 70.8       | -70.8           | 11.1  |      |      |
| FT diesel from forest residue                | GREET  | 1.9                  | 2.5             | 73.0       | -72.3           | 5.2   | 5.0  | 5.3  |
|                                              | JEC v5 | 8.6                  | 1.1             | 70.8       | -70.8           | 9.7   |      |      |
| RD/HVO from fast pyrolysis of forest residue | GREET  | 4.2                  | 20.3            | 73.3       | -72.6           | 25.2  | 24.5 | 26.0 |
|                                              | JEC v5 | 7.2                  | 15.7            | 73.2       | -73.2           | 22.9  |      |      |

Table S19. WTT and combustion results of gaseous fuel SI ICEVs (g CO<sub>2</sub>e/MJ)

|                      |        | Feedstock production | Fuel production | Combustion | Biogenic carbon | Avoided counterfactual emissions | Total  | P10    | P90   |
|----------------------|--------|----------------------|-----------------|------------|-----------------|----------------------------------|--------|--------|-------|
| Fossil CNG           | GREET  | 13.4                 | 2.7             | 57.1       | 0.0             | 0.0                              | 73.2   | 71.1   | 75.4  |
|                      | JEC v5 | 8.8                  | 3.1             | 56.2       | -1.9            |                                  | 68.2   |        |       |
| Manure AD RNG        | GREET  | 0.0                  | -92.3           | 57.1       | -56.3           | 1.3                              | -90.2  | -90.5  | -88.7 |
|                      | JEC v5 | -111.0               | 8.1             | 56.7       | -56.7           |                                  | -103.0 |        |       |
| MSW AD RNG           | GREET  | 0.0                  | 20.8            | 57.1       | -56.3           | -122.1                           | -100.5 | -101.4 | -99.5 |
|                      | JEC v5 | 0.0                  | 9.5             | 56.7       | -56.7           |                                  | 9.5    |        |       |
| Sewage sludge AD RNG | GREET  | 0.0                  | 10.9            | 57.1       | -56.3           | -103.1                           | -91.4  | -95.7  | -86.4 |
|                      | JEC v5 | 0.0                  | 22.3            | 56.7       | -56.7           |                                  | 22.3   |        |       |

Table S20. WTT and combustion results of BEVs (g CO<sub>2</sub>e/MJ)

|                     |        | Feedstock production | Electricity generation | Combustion | Biogenic carbon | Total | P10   | P90   |
|---------------------|--------|----------------------|------------------------|------------|-----------------|-------|-------|-------|
| BEV, Average Grid   | GREET  | 10.3                 | 96.6                   | 0.0        | 0.0             | 106.9 | 100.2 | 117.0 |
|                     | JEC v5 | 0.0                  | 74.5                   | 0.0        | 0.0             | 74.5  |       |       |
| BEV, Renewable Grid | GREET  | 0.0                  | 0.5                    | 0.0        | 0.0             | 0.5   | 0.5   | 0.5   |
|                     | JEC v5 | 0.0                  | 0.0                    | 0          | 0               | 0     |       |       |

Table S21. WTT and combustion results of FCEVs (g CO<sub>2</sub>e/MJ)

|                                               |        | Feedstock production | H <sub>2</sub> production | Combustion | Biogenic carbon | Total | P10   | P90   |
|-----------------------------------------------|--------|----------------------|---------------------------|------------|-----------------|-------|-------|-------|
| H <sub>2</sub> from NG (w/o CCS)              | GREET  | 6.2                  | 85.6                      | 0.0        | 0.0             | 91.8  | 84.0  | 99.9  |
|                                               | JEC v5 | 17.0                 | 83.8                      | 0.0        | 0.0             | 100.8 |       |       |
| H <sub>2</sub> from NG (w/ CCS)               | GREET  | 6.2                  | 18.0                      | 0.0        | 0.0             | 24.2  | 10.9  | 31.6  |
|                                               | JEC v5 | 17.7                 | 22.0                      | 0          | 0               | 39.7  |       |       |
| H <sub>2</sub> from average electricity mix   | GREET  | 155.4                | 0.0                       | 0.0        | 0.0             | 155.4 | 141.5 | 184.0 |
|                                               | JEC v5 | 113.0                | 5.7                       | 0          | 0               | 118.6 |       |       |
| H <sub>2</sub> from renewable electricity mix | GREET  | 0.8                  | 0.0                       | 0          | 0               | 0.8   | 0.7   | 0.9   |
|                                               | JEC v5 | 0.0                  | 9.5                       | 0          | 0               | 9.5   |       |       |

1.7.4 Per km WTW results

Table S22. WTW results for liquid fuel SI ICEVs (g CO<sub>2</sub>e/km)

|                                |               | WTP (WTT)     | Vehicle operation | Total | P10   | P90   |
|--------------------------------|---------------|---------------|-------------------|-------|-------|-------|
| Low-ethanol petroleum gasoline | GREET (E10)   | 35.0          | 159.4             | 194.4 | 191.2 | 199.8 |
|                                | JEC v5 (E10)  | 19.7          | 103.8             | 123.5 |       |       |
|                                | JEC v5 (E5)   | 21.9          | 103.9             | 125.8 |       |       |
| EtOH from corn                 | GREET (E85)   | -25.3         | 156.7             | 131.4 | 119.5 | 146.1 |
|                                | JEC v5 (E100) | -22.1         | 100.8             | 78.7  |       |       |
| EtOH from sugarcane            | GREET (E85)   | -69.6         | 156.7             | 87.1  | 80.9  | 94.1  |
|                                | JEC v5 (E100) | Not available |                   |       |       |       |
| Cellulosic EtOH                | GREET (E85)   | -93.8         | 156.7             | 62.9  | 58.2  | 93.0  |
|                                | JEC v5 (E100) | -75.2         | 100.8             | 25.6  |       |       |

Table S23. WTW results for liquid fuel CI ICEVs (g CO<sub>2</sub>e/km)

|                                              |                 | WTP (WTT) | Vehicle operation | Total | P10   | P90   |
|----------------------------------------------|-----------------|-----------|-------------------|-------|-------|-------|
| Diesel                                       | GREET           | 29.1      | 150.2             | 179.3 | 166.0 | 190.5 |
|                                              | JEC v5          | 24.4      | 96.3              | 120.8 |       |       |
| B7                                           | GREET (Soybean) | 21.8      | 150.3             | 172.1 | 160.5 | 180.0 |
|                                              | JEC v5 (EU mix) | 19.8      | 96.6              | 116.3 |       |       |
| RD/HVO from soybean                          | GREET           | -103.5    | 145.5             | 42.1  | 39.7  | 50.2  |
|                                              | JEC v5          | -17.5     | 92.7              | 75.3  |       |       |
| RD/HVO from rapeseed                         | GREET           | -86.0     | 145.5             | 59.5  | 56.4  | 61.8  |
|                                              | JEC v5          | -24.4     | 92.7              | 68.3  |       |       |
| RD/HVO from UCO                              | GREET           | -102.6    | 145.5             | 43.0  | 39.7  | 50.2  |
|                                              | JEC v5          | -77.0     | 92.7              | 15.7  |       |       |
| FT diesel from forest residue                | GREET           | -134.7    | 145.0             | 10.2  | 9.8   | 10.6  |
|                                              | JEC v5          | -77.0     | 92.7              | 15.7  |       |       |
| RD/HVO from fast pyrolysis of forest residue | GREET           | -95.6     | 145.5             | 49.9  | 47.8  | 51.9  |
|                                              | JEC v5          | -65.2     | 96.3              | 31.1  |       |       |

Table S24. WTW results for gaseous fuel SI ICEVs (g CO<sub>2</sub>e/km)

|                      |        | WTP (WTT) | Vehicle operation | Total  | P10    | P90    |
|----------------------|--------|-----------|-------------------|--------|--------|--------|
| Fossil CNG           | GREET  | 33.4      | 118.6             | 152.0  | 144.2  | 157.4  |
|                      | JEC v5 | 20.9      | 78.4              | 99.4   |        |        |
| Manure AD RNG        | GREET  | -305.9    | 118.6             | -187.3 | -191.5 | -178.7 |
|                      | JEC v5 | -221.1    | 80.5              | -140.6 |        |        |
| MSW AD RNG           | GREET  | -327.3    | 118.6             | -208.7 | -215.8 | -200.5 |
|                      | JEC v5 | -221.1    | 80.5              | -140.6 |        |        |
| Sewage sludge AD RNG | GREET  | -308.3    | 118.6             | -189.7 | -200.2 | -176.8 |
|                      | JEC v5 | -47.6     | 80.5              | 32.9   |        |        |

Table S25. WTW results for BEV (g CO<sub>2</sub>e/km)

|                                 |              | WTP (WTT) | Vehicle operation | Total | P10  | P90  |
|---------------------------------|--------------|-----------|-------------------|-------|------|------|
| Short-range BEV, average grid   | GREET (161)  | 67.7      | 0                 | 67.7  | 62.8 | 74.7 |
|                                 | JEC v5 (200) | 31.9      | 0.0               | 31.9  |      |      |
| Short-range BEV, renewable grid | GREET (161)  | 0.3       | 0                 | 0.3   | 0.3  | 0.4  |
|                                 | JEC v5 (200) | 0         | 0                 | 0     |      |      |
| Long-range BEV, average grid    | GREET (483)  | 73.1      | 0.0               | 73.1  | 68.7 | 83.1 |
|                                 | JEC v5 (400) | 33.3      | 0.0               | 33.3  |      |      |
| Long-range BEV, renewable grid  | GREET (483)  | 0.4       | 0.0               | 0.4   | 0.4  | 0.4  |
|                                 | JEC v5 (400) | 0.0       | 0.0               | 0.0   |      |      |

Table S26. WTW results for FCEVs (g CO<sub>2</sub>e/km)

|                                               |        | WTP (WTT) | Vehicle operation | Total | P10   | P90   |
|-----------------------------------------------|--------|-----------|-------------------|-------|-------|-------|
| H <sub>2</sub> from NG (without CCS)          | GREET  | 88.2      | 0.0               | 88.2  | 79.9  | 96.1  |
|                                               | JEC v5 | 70.3      | 0.0               | 70.3  |       |       |
| H <sub>2</sub> from NG (with CCS)             | GREET  | 23.2      | 0.0               | 23.2  | 10.7  | 30.1  |
|                                               | JEC v5 | 27.7      | 0.0               | 27.7  |       |       |
| H <sub>2</sub> from average electricity mix   | GREET  | 149.3     | 0.0               | 149.3 | 136.3 | 176.1 |
|                                               | JEC v5 | 82.7      | 0.0               | 82.7  |       |       |
| H <sub>2</sub> from renewable electricity mix | GREET  | 0.8       | 0.0               | 0.8   | 0.7   | 0.8   |
|                                               | JEC v5 | 6.6       | 0.0               | 6.6   |       |       |

3. Relative per MJ WTT and combustion GHG results

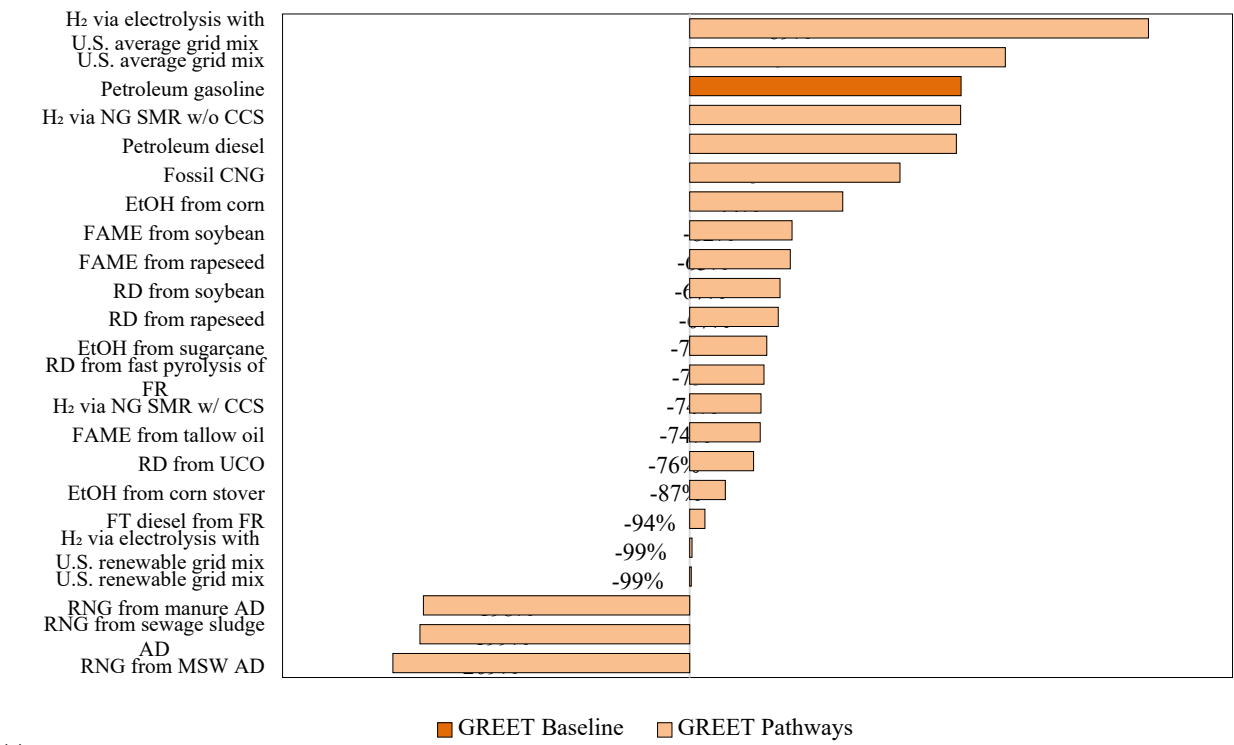

(a)

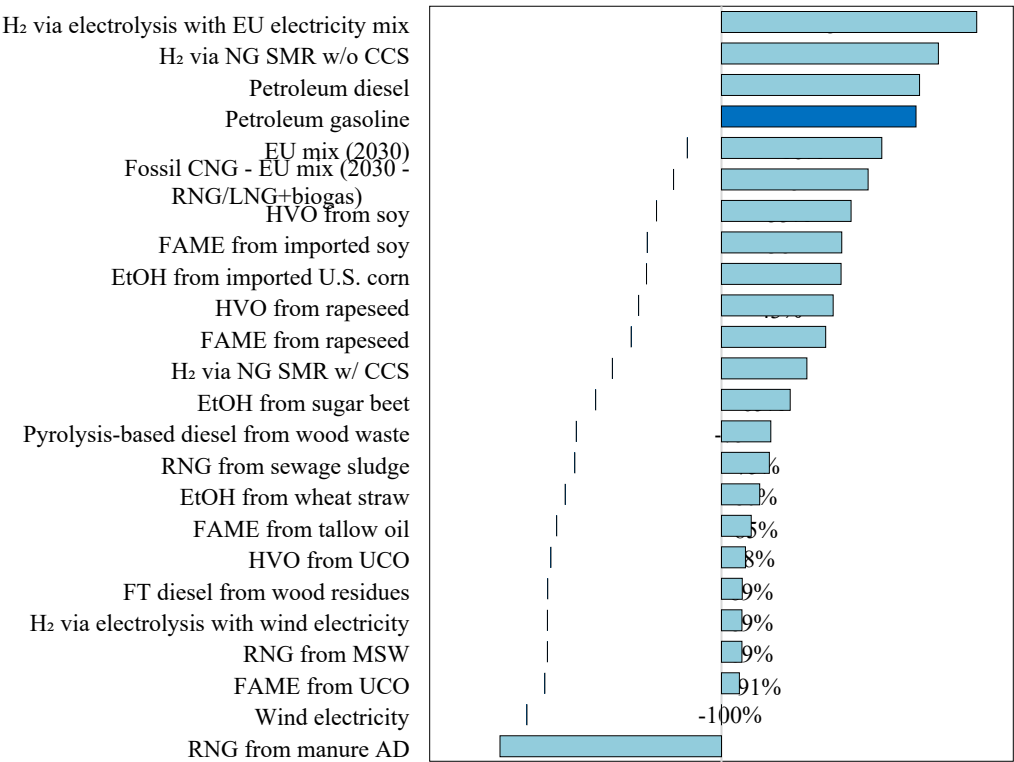

(b)

Figure S1. Per MJ WTT and combustion GHG emission reductions of fuel pathways relative to baseline petroleum gasoline (a) in the United States according to GREET and (b) in EU according to JEC v5. The results are normalized to the U.S. petroleum gasoline blendstock and EU petroleum gasoline blendstock as the baseline, respectively.

## References

1. H. Cai, J. Han, G. Forman, V. Divita, A. Elgowainy and M. Wang, Analysis of Petroleum Refining Energy Efficiency of U.S. Refineries, 2013.
2. L. Ou and H. Cai, Updated Vented, Flaring, and Fugitive Greenhouse Gas Emissions for Crude Oil Production in the GREET1\_2018 Model, 2018.
3. Thinkstep, Greenhouse Gas Intensity of Natural Gas; Study for the Natural & Bio Gas Vehicle Association (NGVA) Europe, 2017.
4. M. Prussi, M. Padella, M. Conton, E. D. Postma and L. Lonza, J. Cleaner Prod., 2019, 222, 565-572.
5. MPhy Energy S.A., New generation alkaline electrolysis for large-scale platforms (multi MW), 2017.
6. A. Moro and L. Lonza, Transportation Research Part D: Transport and Environment, 2018, 64, 5-14.
7. International Fertilizer Industry Association, International fertilizer Association: fertilizer use by crop 2006/7, <http://www.fertilizer.org/ifa/Home-Page/STATISTICS>, (accessed June 2010).
8. International Energy Agency, World Energy Outlook 2018, 2018.
9. J. Han, A. Elgowainy, I. Palou-Rivera, J. Dunn and M. Wang, Well-to-wheels analysis of fast pyrolysis pathways with the GREET model, Argonne National Lab (ANL), Argonne, IL (United States), 2011.
10. Fertilizers Europe, Carbon footprint reference values, 2015.
11. Exergica, European Commission, Directorate-General for Energy, 2015.
12. T. Ekbom, N. Berglin and S. Loegdberg, Black Liquor Gasification with Motor Fuel Production - BLGMF II - A techno-economic feasibility study on catalytic Fischer-Tropsch synthesis for synthetic diesel production in comparison with methanol and DME as transport fuels, ; Swedish Energy Agency, Eskilstuna (Sweden), 2005.
13. Concawe, Estimating the marginal CO<sub>2</sub> intensities of EU refinery products, Report Report no. 1/17, Prepared for the Concawe Refinery Management Group by its Refinery Technology Support Group, 2017.
14. B. Kampman, C. Leguijt, T. Scholten, J. Tallat-Kelsaite, R. Brückmann, G. Maroulis, J. P. Lesschen, K. Meesters, N. Sikirica and B. Elbersen, 2017.
15. Areva H2Gen, PEM electrolyzers: Product Line Specifications, 2016.
16. C. Malins, S. Galarza, A. Baral, A. Brandt, H. El-Houjeiri, G. Howorth, T. Grabiell and D. Kodjak. Washington D.C.: The International Council on Clean Transportation (ICCT): Upstream Emissions of Fossil Fuel Feedstocks for Transport Fuels Consumed in the European Union, 2014
17. A. Elgowainy, J. Han, H. Cai, M. Wang, G. S. Forman and V. B. DiVita, *Environ. Sci. Technol.*, 2014, **48**, 7612–7624.
18. A. Burnham, J. Han, C. E. Clark, M. Wang, J. B. Dunn and I. Palou-Rivera, *Environ. Sci. Technol.*, 2012, 46, 619-627.
19. N. Brinkman, M. Wang, T. Weber and T. Darlington, Well-to-Wheels Analysis of Advanced Fuel/Vehicle Systems: A North American Study of Energy Use, Greenhouse Gas Emissions, and Criteria Pollutant Emissions; EERE Publication and Product Library, Washington, D.C. (United States), 2005.
20. H. Cai, A. Burnham, R. Chen and M. Wang, *Energy Policy*, 2017, 109, 565-578.
21. Z. Wang, J. B. Dunn, J. Han and M. Q. Wang, Material and energy flows in the production of cellulosic feedstocks for biofuels for the GREET model, Argonne National Lab (ANL), Argonne, IL (United States), 2013.
22. H. Cai, J. B. Dunn, Z. Wang, J. Han and M. Q. Wang, *Biotechnol. Biofuels*, 2013, 6, 141.
23. M. Wang, J. Han, J. B. Dunn, H. Cai and A. Elgowainy, *Environ. Res. Lett.*, 2012, 7, 045905.
24. J. B. Dunn, S. Mueller, M. Wang and J. Han, *Biotechnol. Lett.*, 2012, 34, 2259-2263.
25. D. Humbird, R. Davis, L. Tao, C. Kinchin, D. Hsu, A. Aden, P. Schoen, J. Lukas, B. Olthof and M. Worley, Process design and economics for biochemical conversion of lignocellulosic biomass to ethanol: dilute-acid pretreatment and enzymatic hydrolysis of corn stover, National Renewable Energy Laboratory, Golden, CO, 2011.
26. X. Xie, M. Wang and J. Han, *Environ. Sci. Technol.*, 2011, 45, 3047-3053.
27. A. Elgowainy, J. Han and H. Zhu, Systems Assessment Group, Energy Systems Group, Argonne National Laboratory, 2013.
28. L. Ou and H. Cai, Update of Emission Factors of Greenhouse Gases and Criteria Air Pollutants, and Generation Efficiencies of the US Electricity Generation Sector, Argonne National Lab (ANL), Argonne, IL (United States), 2020.
29. J. Han, M. Mintz and M. Wang, Waste-to-wheel analysis of anaerobic-digestion-based renewable natural gas pathways with the GREET model, Argonne National Lab (ANL), Argonne, IL (United States), 2011.
30. U. Lee, J. Han and M. Wang, Well-to-Wheels Analysis of Compressed Natural Gas and Ethanol from Municipal Solid Waste, Argonne National Lab (ANL), Argonne, IL (United States), 2016.
31. R. Chen, Z. Qin, J. Han, M. Wang, F. Taheripour, W. Tyner, D. O'Connor and J. Duffield, *Bioresour. Technol.*, 2018, 251, 249-258.
32. H. Huo, M. Wang, C. Bloyd and V. Putsche, *Environ. Sci. Technol.*, 2009, 43, 750-756.
